# Supplementary material for: A Novel Approach to Helicobacter pylori Pan-Genome Analysis for Identification of Genomic Islands
Source: PubMed Central journal article supplement (PMC4978471; doi:10.1371/journal.pone.0159419), 2016-08-09
Supplement: pone.0159419.s004.pdf [file pone.0159419.s004.pdf]

A

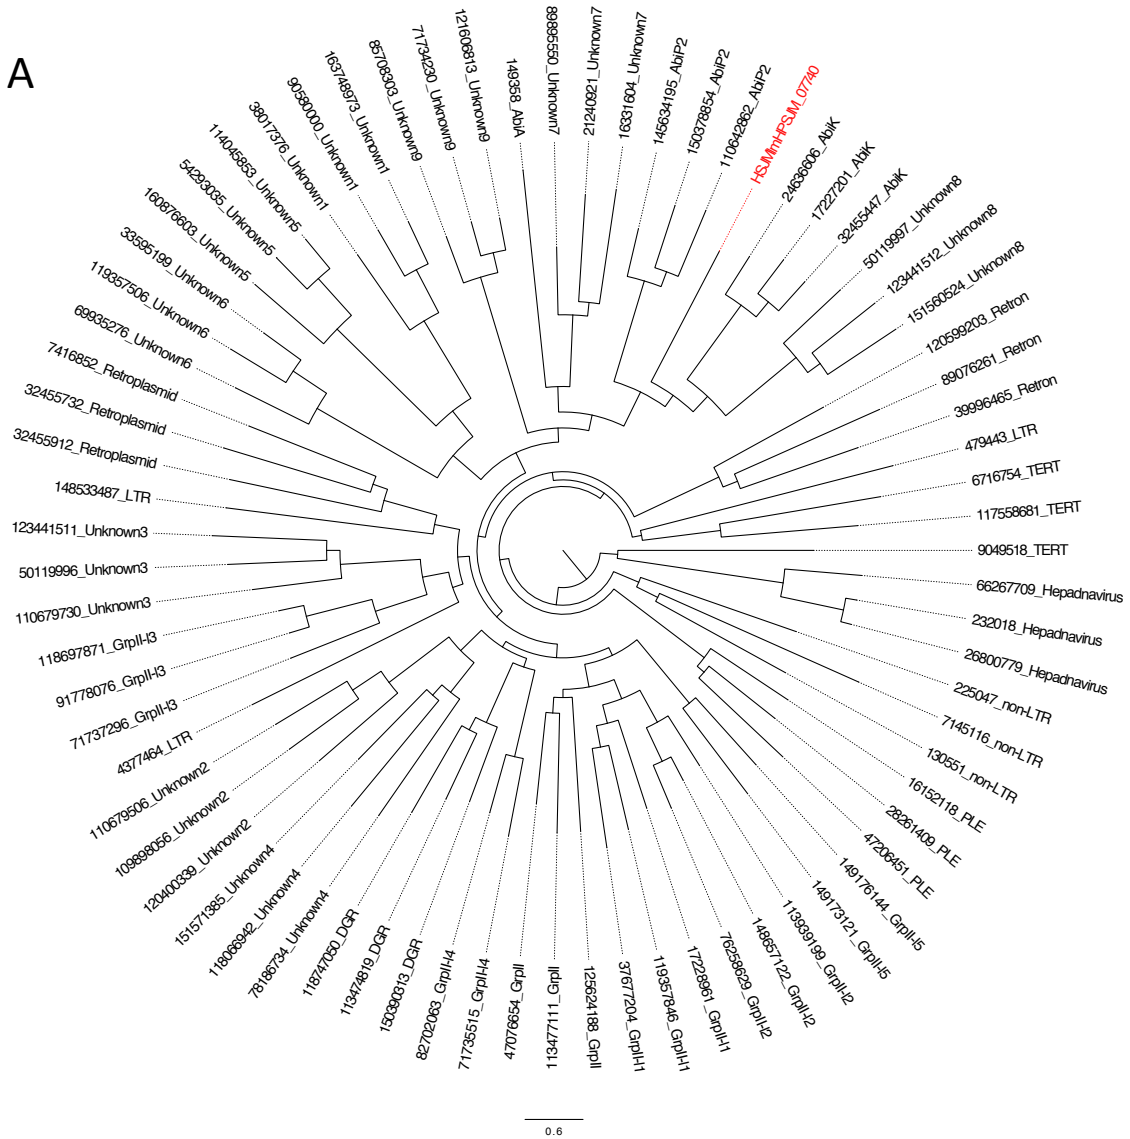

B

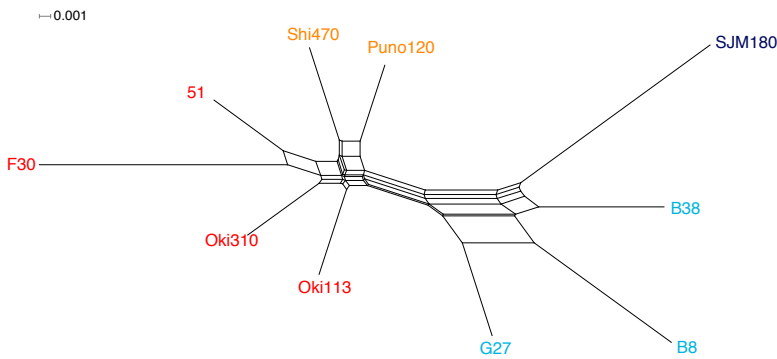

**S4 Fig. (A) Phylogenetic tree of reverse transcriptase homologs including the HPSJM\_07740 gene of *H. pylori* SJM180. (B) Phylogenetic network based on the alignment of nucleotide sequences of CGC-10 genes. Strain names are assigned colors according to the phylogeographical groups as in Fig 4.**
